# Supplementary material for: Fine structuration of low-temperature co-fired ceramic (LTCC) microreactors
Source: Royal Society of Chemistry journal article supplement (doi:10.1039/c4lc01105h), 2014-11-11
Supplement: c4lc01105h6.pdf [file c4lc01105h6.pdf]

## Supplemental information

Figure S1 A comparison of deflection profile in laminated HL2K (266  $\mu\text{m}$ , in blue) and DP951 (254  $\mu\text{m}$ , in red) at green state with similar cavity wall thickness.

Figure S2 Cavity deflection results of fired HL2K samples with one (in black) and two (in red) cover layers

Figure S3 Cross-section images of LTCC DP951 (left) and HL2K (right) samples laminated under pressure of 2 MPa at 70°C and fired by their standard conditions. The dash lines indicate the layer of each LTCC tape.

Figure S4 Contact angle results of fired DP951 (left) and HL2K (right) LTCC material using aqueous droplets.
